# Supplementary material
Source: PubMed Central journal article supplement (PMC1502543)

# PbRC

# PSI

# PSII

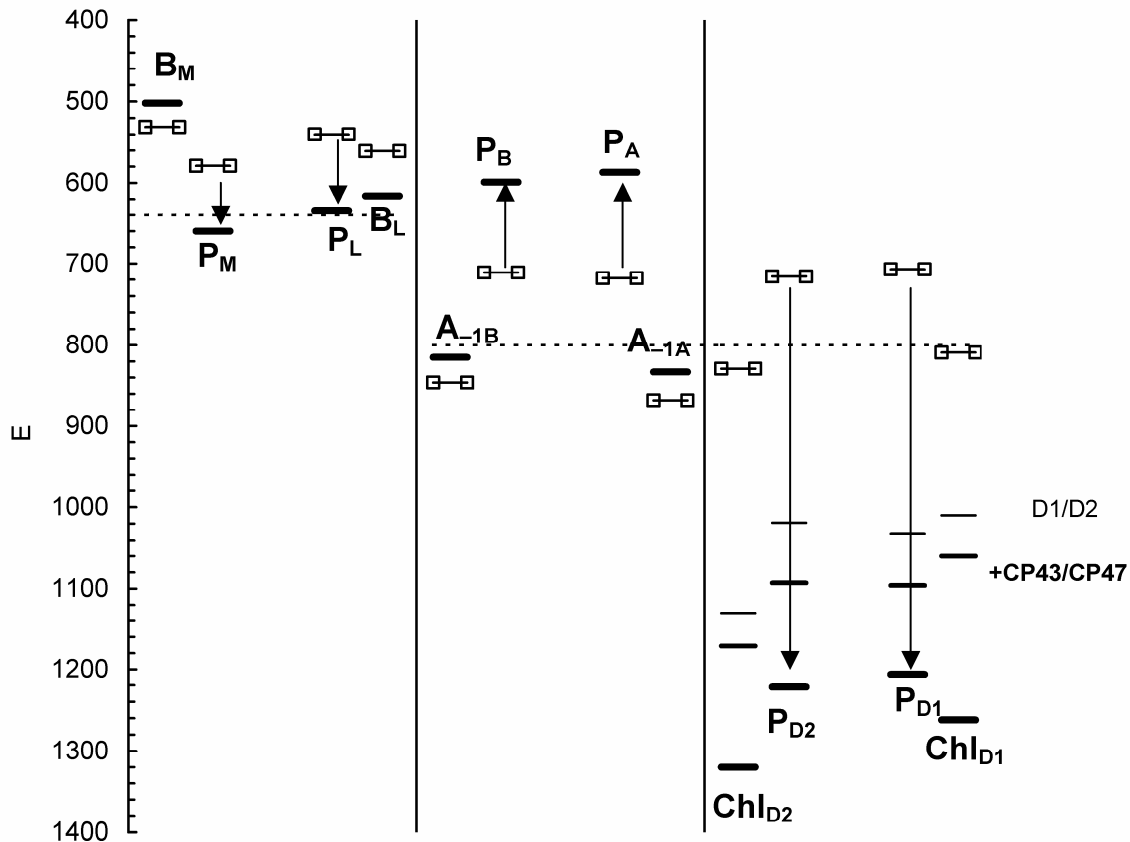

Supplement: pnas_0601446103_1.pdf [file pnas_0601446103_1.pdf]
